# Supplementary material
Source: Springer Nature journal article supplement (https://www.springermedizin.de/resource/supplementary/12936_2014_3664_MOESM8_ESM.pdf/9546136)
Supplement: MOESM8 [file 9546136]

Infectious

Not Infectious

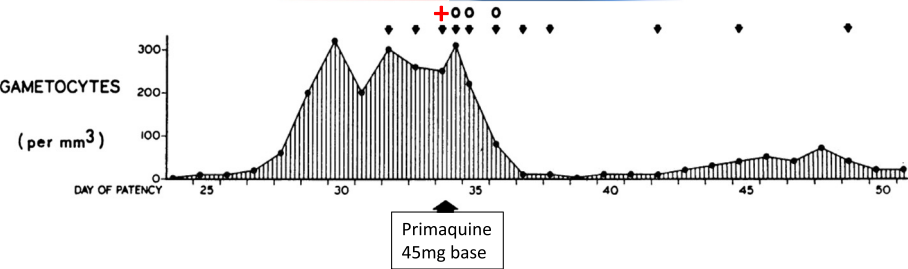

Oocysts

|          |          |          |          |          |          |          |          |          |          |           |
|----------|----------|----------|----------|----------|----------|----------|----------|----------|----------|-----------|
| <u>6</u> | <u>6</u> | <u>7</u> | <u>6</u> | <u>0</u> | <u>0</u> | <u>0</u> | <u>0</u> | <u>0</u> | <u>9</u> | <u>11</u> |
| 10       | 10       | 10       | 10       | 10       | 10       | 10       | 10       | 10       | 40       | 30        |

Sporozoites

|          |          |           |           |          |          |          |          |          |          |           |
|----------|----------|-----------|-----------|----------|----------|----------|----------|----------|----------|-----------|
| <u>3</u> | <u>2</u> | <u>35</u> | <u>11</u> | <u>9</u> | <u>2</u> | <u>0</u> | <u>0</u> | <u>0</u> | <u>5</u> | <u>15</u> |
| 10       | 10       | 85        | 85        | 85       | 85       | 10       | 10       | 60       | 60       | 52        |
